# Supplementary material for: Anhydrous proton conductivities of squaric acid derivatives
Source: Royal Society of Chemistry journal article supplement (doi:10.1039/c2cc31283b), 2012-01-01
Supplement: c2cc31283b.pdf [file c2cc31283b.pdf]

Supporting Information for:

**Anhydrous Proton Conductivities of Squaric Acid Derivatives**

Dipankar Basak, Craig Versek, Daniel T. Toscano, Scott Christensen, Mark T. Tuominen, and Dhandapani Venkataraman

*University of Massachusetts Amherst, 710 N Pleasant Street, Amherst, MA 01003*

- I. General Information (S1-S2)
- II. Thermal Gravimetric Analysis (TGA) (S2)
- III. Differential Scanning Calorimetry (DSC) (S2-S3)
- IV. Proton Conductivity vs. time (S4)
- V. Cyclic Voltammetry (S5)

**I. General Information**

All reactions were carried out in oven-dried glassware (160 °C). The chemicals were purchased from major chemical suppliers and were used without further purification unless otherwise noted. Tetrahydrofuran was redistilled over sodium-benzophenone ketyl. Flash chromatography was performed using silica gel from Sorbent Technologies (Standard Grade, 60 Å, 40-63  $\mu$ m). Analytical thin layer chromatography was performed on pre-coated silica gel glass plate with visualization under UV light or staining in potassium permanganate solution. All  $^1\text{H}$  NMR spectra were recorded on a Bruker DPX 400 MHz spectrometer and compared with the NMR, already reported in the literature (see main text).

TGA was carried out using a TA Instruments TGA 2950 thermogravimetric analyzer with a heating rate of 10 °C/min from room temperature to 500 °C under nitrogen.

Differential scanning calorimetry (DSC) was performed on a Mettler–Toledo model DSC 822<sup>c</sup> differential scanning calorimeter, where temperature and enthalpy were calibrated with In (430 K, 3.3 J/mol) and Zn (692.7 K, 12 J/mol) standard samples using sealed Al sample pans. Cooling and heating profiles were recorded and analyzed using the Mettler–Toledo STAR<sup>c</sup> software system. Heating and cooling rates were 10 °C/min and 5 °C/min, respectively.

X-Ray scattering was done using an in-house setup from Molecular Metrology Inc. (presently sold as Rigaku S-Max3000). It uses a 30 W microsource (Bede) with a  $30 \times 30 \mu\text{m}^2$  spot size matched to a Maxflux<sup>®</sup> optical system (Osmic) leading to a low-divergence beam of monochromatic  $\text{CuK}_\alpha$  radiation (wavelength  $\lambda=0.1542 \text{ nm}$ ). After passing beam defining and guard pinholes, the beam of about 0.4 mm diameter enters the sample chamber. Samples were placed within a hot stage connected to an Omega CN76000 temperature controller. WAXS is performed using an image plate (maximum resolution 50  $\mu\text{m}$ ) positioned in the sample chamber at a distance of 139 mm. The whole system is evacuated. The actual scattering angles are calibrated using the accurately known reflections from tricosane.

Impedance data were obtained using a Solartron 1260 frequency response analyzer in the range 0.1 Hz to 32MHz with a sinusoidal excitation voltage of 0.1 V root-mean-square amplitude. Vacuum dried samples were placed into a cavity ( $L = 0.1 \text{ cm}$  long by  $A = 0.07917 \text{ cm}^2$  cross-sectional area) between two custom brass electrodes, forming liquid seals at the ends of a PTFE tube. The sample's resistance to proton transport,  $R$ , was estimated by fitting a constant value to the plateau of impedance magnitude, which occurred within this frequency range. Conductivity was computed as  $\sigma = L/(R \cdot A)$ . Measurements were conducted with a home-built sample holder placed in a Cascade-TEK TVO-2 vacuum oven. Samples were heated under vacuum up to 120 °C, held for ~ 10 h, and allowed to cool to near ambient temperature, while conductivity was monitored at regular time intervals of ~ 0.5 h.

Cyclic voltammetry (CV) studies were done using a BAS CV-50 W instrument. CV was recorded with tetrabutylammonium hexafluorophosphate as a supporting electrolyte (0.1 M) in acetonitrile with platinum as the working electrode. The redox potentials were determined versus an  $\text{Ag}/\text{Ag}^+$  reference electrode. The working and auxiliary electrodes were cleaned after each run. In these conditions, the redox potential of  $\text{Fc}/\text{Fc}^+$  ( $\text{Fc}$  = ferrocene) was +0.09 V *versus*  $\text{Ag}/\text{Ag}^+$ .

## II. Thermal Gravimetric Analysis (TGA)

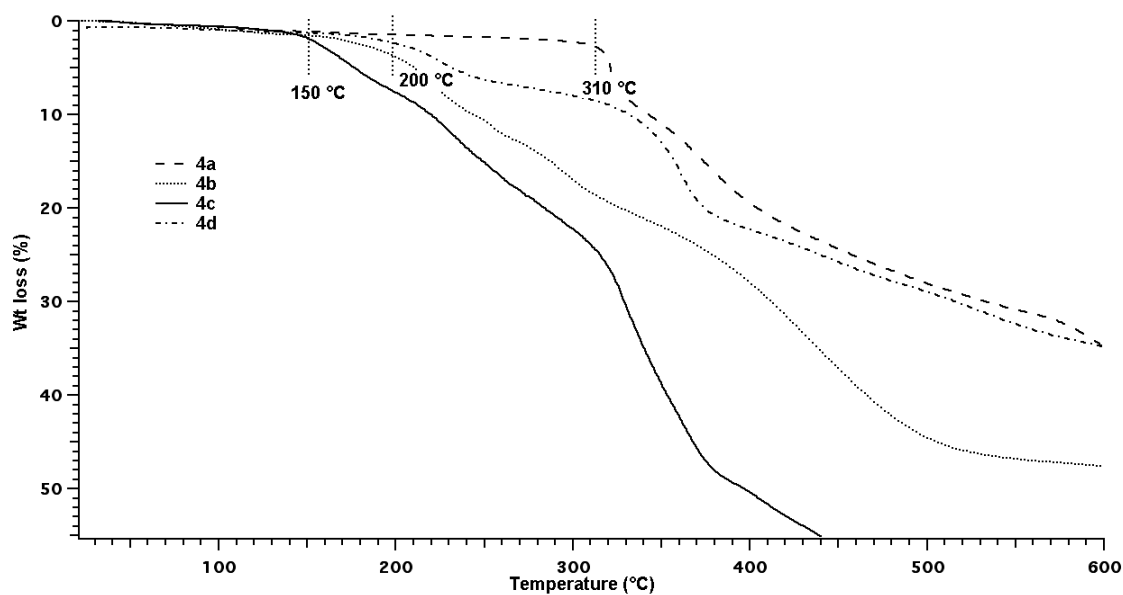

Fig. S1 Thermogravimetric Analysis (TGA) of **4a-4d** (heating rate 10 °C/min).

## III. Differential Scanning Calorimetry (DSC)

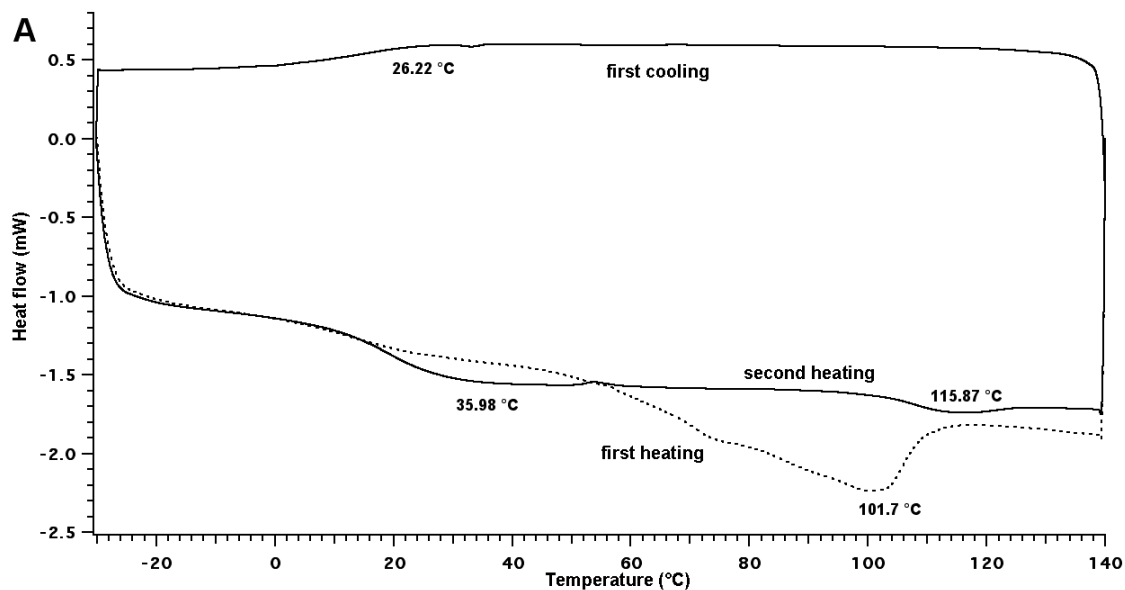

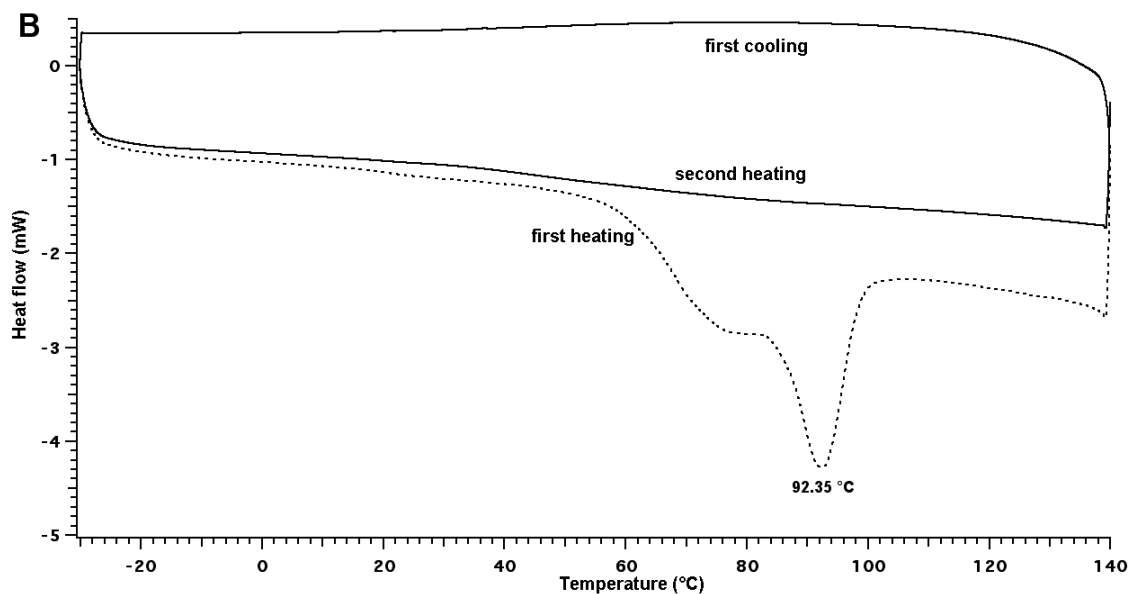

**Fig. S2:** a) Differential scanning calorimetric traces for compounds **4b** (A) and **4c** (B) from the first heating/cooling and second heating cycle. The heating and cooling rates were 10 °C/min and 5 °C/min, respectively.

#### IV. Proton Conductivity vs time

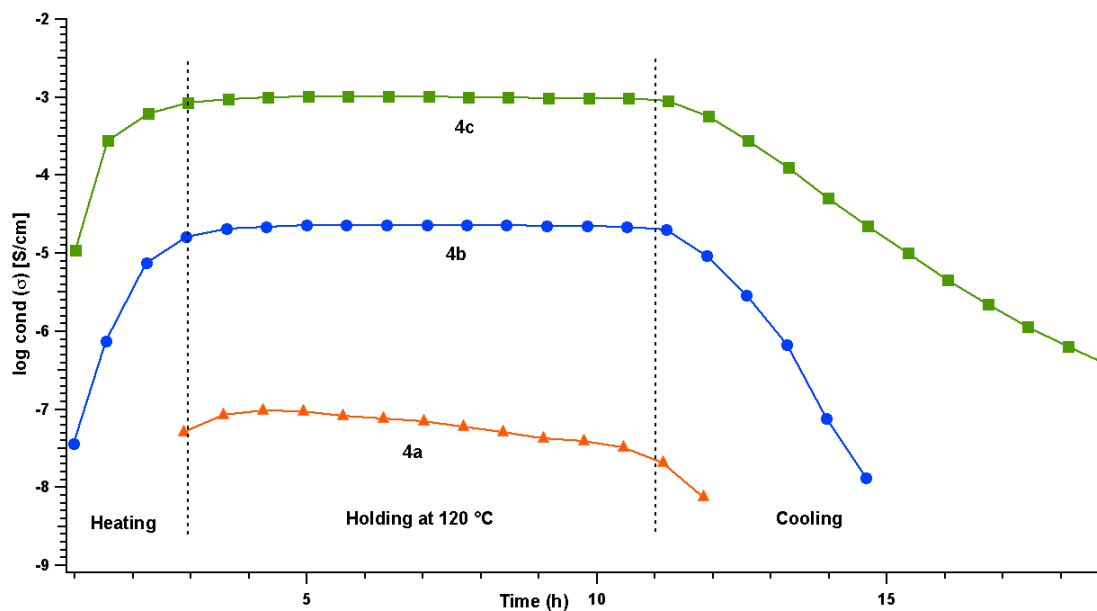

**Fig. S3** Monitoring proton conductivities of **4a**, **4b** and **4c** vs. time.

## V. Cyclic Voltammetry (CV)

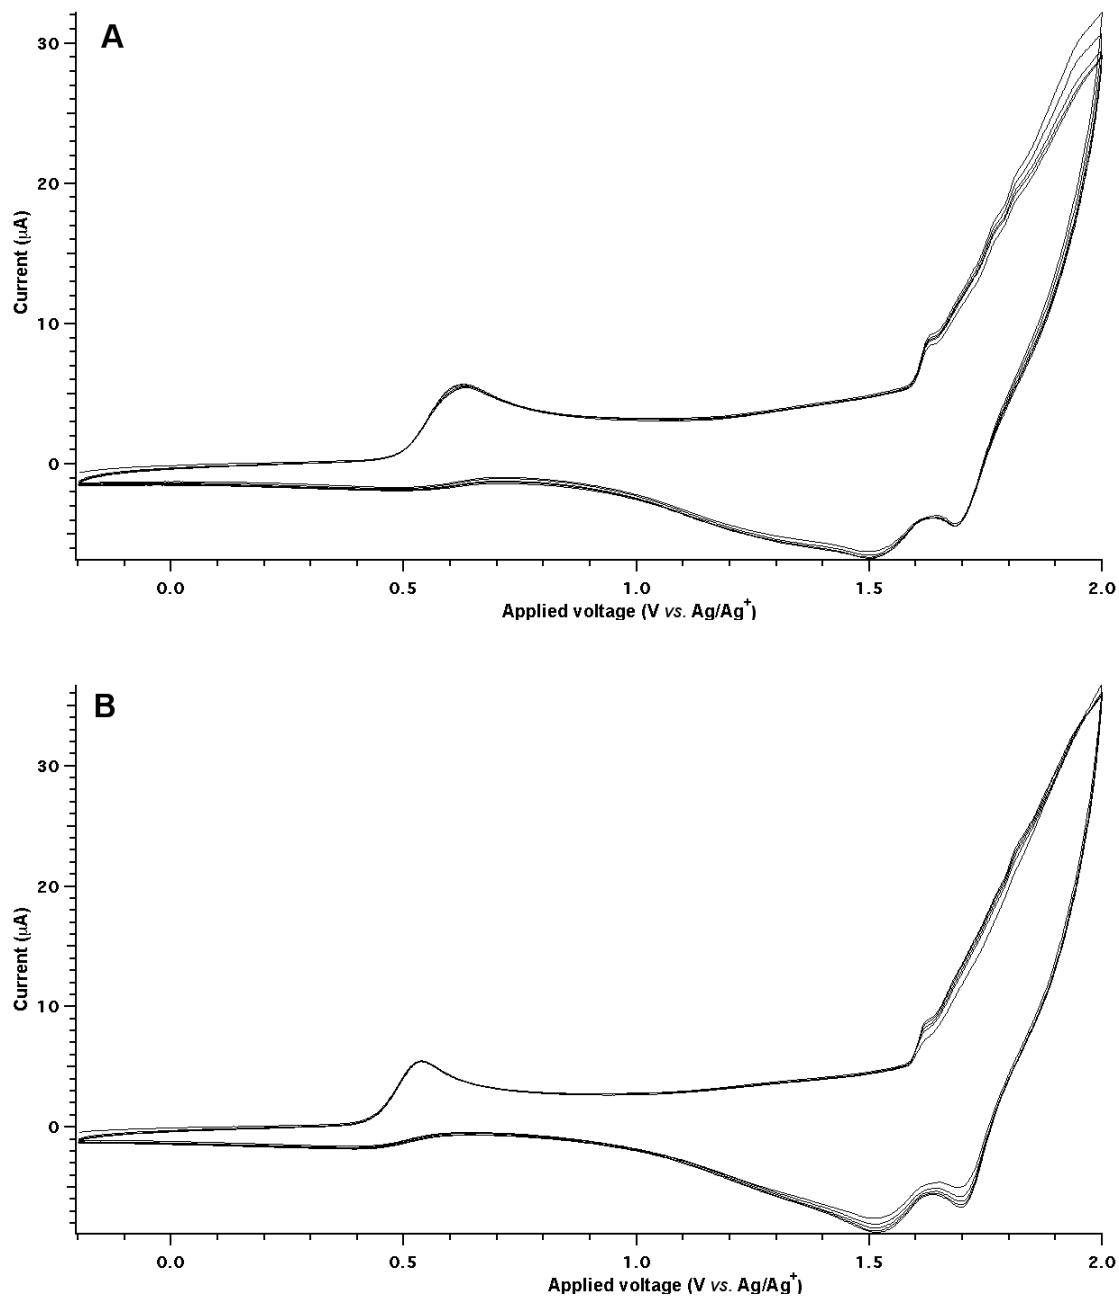

**Fig. S4** Cyclic voltammograms of **4b** (A) and **4c** (B) were recorded at  $1 \times 10^{-3}$  M concentration in 0.1 M TBAPF<sub>6</sub>-CH<sub>3</sub>CN solution at 25 °C. The scan rate was 100 and ten subsequent cycles were recorded.
